# Supplementary material for: Towards Prepared mums (TOP-mums) for a healthy start, a lifestyle intervention for women with overweight and a child wish: study protocol for a randomised controlled trial in the Netherlands
Source: PubMed Central journal article supplement — BMJ Open. 2019 Nov 19;9(11):e030236. doi: 10.1136/bmjopen-2019-030236 (PMC6886927; doi:10.1136/bmjopen-2019-030236), 2019-11-19
Supplement: bmjopen-2019-030236supp004.pdf [file bmjopen-2019-030236supp004.pdf]

**Supplement 4: Consultations with personal lifestyle coach and dietician**

|                                 | Preconception |         |          |          |          |          |           | During pregnancy |          |          |          |          |          |          |          | Postpartum |          |          |          |            |          |           |
|---------------------------------|---------------|---------|----------|----------|----------|----------|-----------|------------------|----------|----------|----------|----------|----------|----------|----------|------------|----------|----------|----------|------------|----------|-----------|
|                                 | Baseline      | 1 month | 2 months | 3 months | 6 months | 9 months | 12 months | 6 weeks          | 12 weeks | 16 weeks | 20 weeks | 28 weeks | 32 weeks | 36 weeks | 38 weeks | 1 month    | 3 months | 4 months | 6 months | 7.5 months | 9 months | 12 months |
| <b>Personal lifestyle coach</b> | x             | x       | x        | x        | x        | x        | x         | x                | x        | x        | x        |          | x        | x        |          | x          | x        |          | x        |            | x        | x         |
| <b>Dietician</b>                | x             | x       |          | x        | x        | x        |           | x                | x        |          | x        | x        |          | x        |          | x          |          | x        |          | x          |          |           |
