# Supplementary material for: Towards Prepared mums (TOP-mums) for a healthy start, a lifestyle intervention for women with overweight and a child wish: study protocol for a randomised controlled trial in the Netherlands
Source: PubMed Central journal article supplement — BMJ Open. 2019 Nov 19;9(11):e030236. doi: 10.1136/bmjopen-2019-030236 (PMC6886927; doi:10.1136/bmjopen-2019-030236), 2019-11-19
Supplement: bmjopen-2019-030236supp005.pdf [file bmjopen-2019-030236supp005.pdf]

**Supplement 5: Questions screening eating disorder**

1. Are you unsatisfied about your eating habits?
2. Do you ever eat secretly?
3. Does your body weight have influence on your emotional feelings?
4. Do you think that eating plays an important role in your life?
5. Have you ever been afraid of losing control of your eating behavior?
6. Have you ever had binge eating?
7. Do you ever have feelings of shame or guilt when you have eaten?
8. Have you ever had trouble concentrating because you had to think about food?
